# Supplementary material for: TomoPyUI: a user-friendly tool for rapid tomography alignment and reconstruction
Source: PubMed Central journal article supplement (PMC11226142; doi:10.1107/s1600577524003989), 2024-06-26
Supplement: s-31-00979-sup1.pdf [file s-31-00979-sup1.pdf]

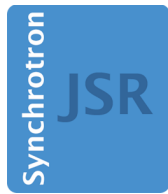

JOURNAL OF  
SYNCHROTRON  
RADIATION

**Volume 31 (2024)**

**Supporting information for article:**

***TomopyUI*: a user-friendly tool for rapid tomography alignment and reconstruction**

**Samuel S. Welborn, Molleigh B. Preefer and Johanna Nelson Weker**

## Supplemental Information to TomoPyUI: a User-friendly Tool for Rapid Tomography Alignment and Reconstruction

Samuel S. Welborn,<sup>1,2</sup> Molleigh B. Preefer,<sup>2</sup> Johanna Nelson Weker<sup>2</sup>

<sup>1</sup>*Department of Materials Science & Engineering, University of Pennsylvania, Philadelphia, Pennsylvania 19104, USA.*

<sup>2</sup>*Stanford Synchrotron Radiation Lightsource, SLAC National Accelerator Laboratory, Menlo Park, California 94025, USA.*

*\*Correspondence should be addressed to J.N.W. (jnelson@slac.stanford.edu)*

### Handling larger datasets

*TomoPyUI* is able to handle the import and processing of large datasets. For an example of this, we have imported the tomo\_00001 (from the round-robin datasets) from tomobank<sup>1</sup> into *TomoPyUI* using the APS\_32ID importer on [this GitHub pull request](#). This dataset, approximately 11 GB in size, comprises around 1500 projections with dimensions of 1792 x 2048 pixels.

In **Supplemental Figure 1**, we show that importing the data and finding its center of rotation is possible within *TomoPyUI*. In **Supplemental Figure 2**, we show that this data can be used for alignment. Here we have used performed 10 iterations of the joint alignment/reconstruction algorithm using the SIRT3D *Astra* algorithm on a subset of the full dataset (8x binning, pixel range shown in “Analysis Projections”).

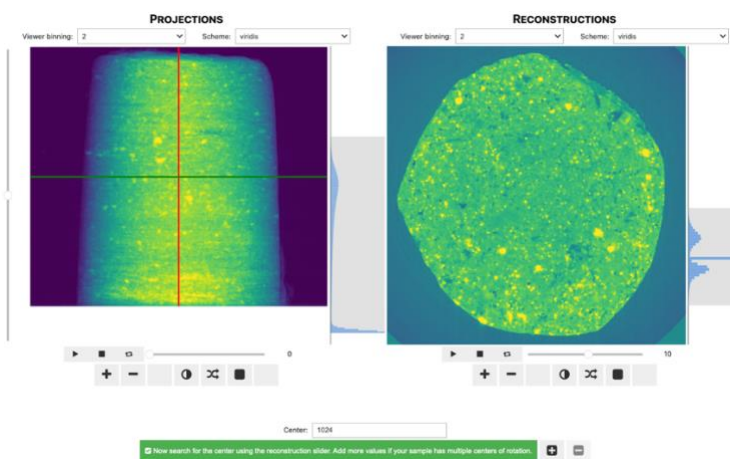

**Supplemental Figure 1.** Identification of the center of rotation within *TomoPyUI* for the tomo\_00001 dataset from TomoBank.

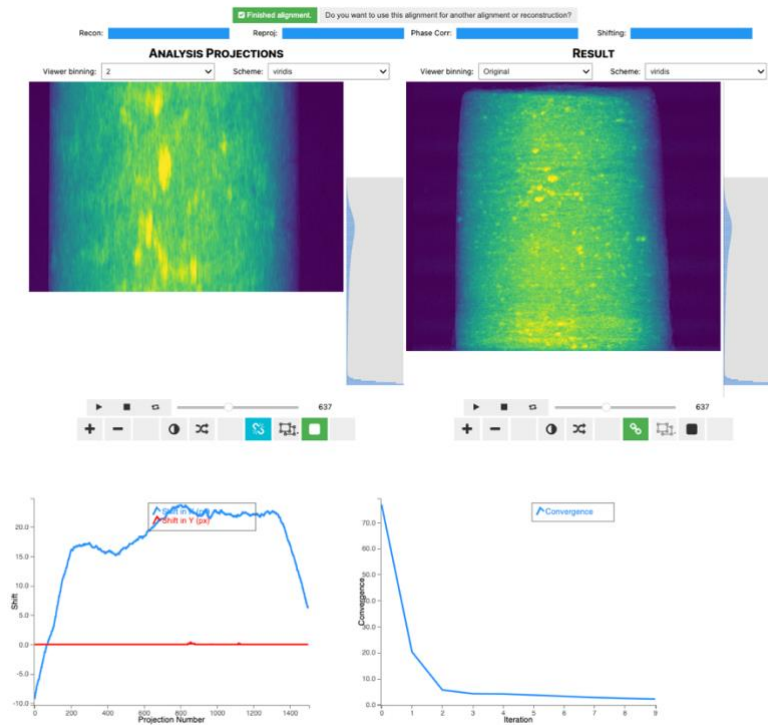

**Supplemental Figure 2.** Alignment of the tomo\_00001 dataset after conducting 10 iterations of the joint alignment/reconstruction method using the SIRT3D algorithm from Astra on a downsampled subset (8x binning). The "Analysis Projections" details the pixel range involved in the alignment, showcasing *TomoPyUI*'s capability to use only a fraction of the full dataset for alignment.
